# Supplementary material for: Rational design of artificial dye-decolorizing peroxidases using myoglobin by engineering Tyr/Trp in the heme center
Source: Royal Society of Chemistry journal article supplement (doi:10.1039/c7dt02302b), 2017-01-01
Supplement: c7dt02302b1.pdf [file c7dt02302b1.pdf]

# **Rational Design of Artificial Dye-decolorizing Peroxidases using Myoglobin by Engineering Tyr/Trp in the Heme Center**

Le-Le Li <sup>a†</sup>, Hong Yuan <sup>b†</sup>, Fei Liao <sup>a†</sup>, Bo He <sup>a</sup>, Shu-Qin Gao <sup>c</sup>, Ge-Bo Wen <sup>c</sup>,

Xiangshi Tan <sup>b</sup> and Ying-Wu Lin <sup>a,c\*</sup>

<sup>a</sup> *School of Chemistry and Chemical Engineering, University of South China, Hengyang 421001, China; E-mail: linlinying@hotmail.com; ywlin@usc.edu.cn*

<sup>b</sup> *Department of Chemistry & Institute of Biomedical Science, Fudan University, Shanghai 200433, China.*

<sup>c</sup> *Laboratory of Protein Structure and Function, University of South China, Hengyang 421001, China.*

## **Supporting Information**

### **Contents**

|                                                                                                        |          |
|--------------------------------------------------------------------------------------------------------|----------|
| <b>1. Figure S1.</b> X-ray structure of native DyP and WT Mb.                                          | p. S2    |
| <b>2. Figure S2.</b> MS spectra for Mb mutants.                                                        | p. S3-S7 |
| <b>3. Figure S3.</b> Stopped-flow spectra of RB19 oxidation catalyzed by WT Mb.                        | p. S8    |
| <b>4. Figure S4.</b> Comparison of Michaelis-Menten equation and Hill equation fitting.                | p. S9    |
| <b>5. Figure S5.</b> EPR spectra of WT Mb and F43Y Mb in reaction with H <sub>2</sub> O <sub>2</sub> . | p. S10   |
| <b>6. Table 1.</b> X-ray crystallography data collection and refinement statistics                     | p. S11   |

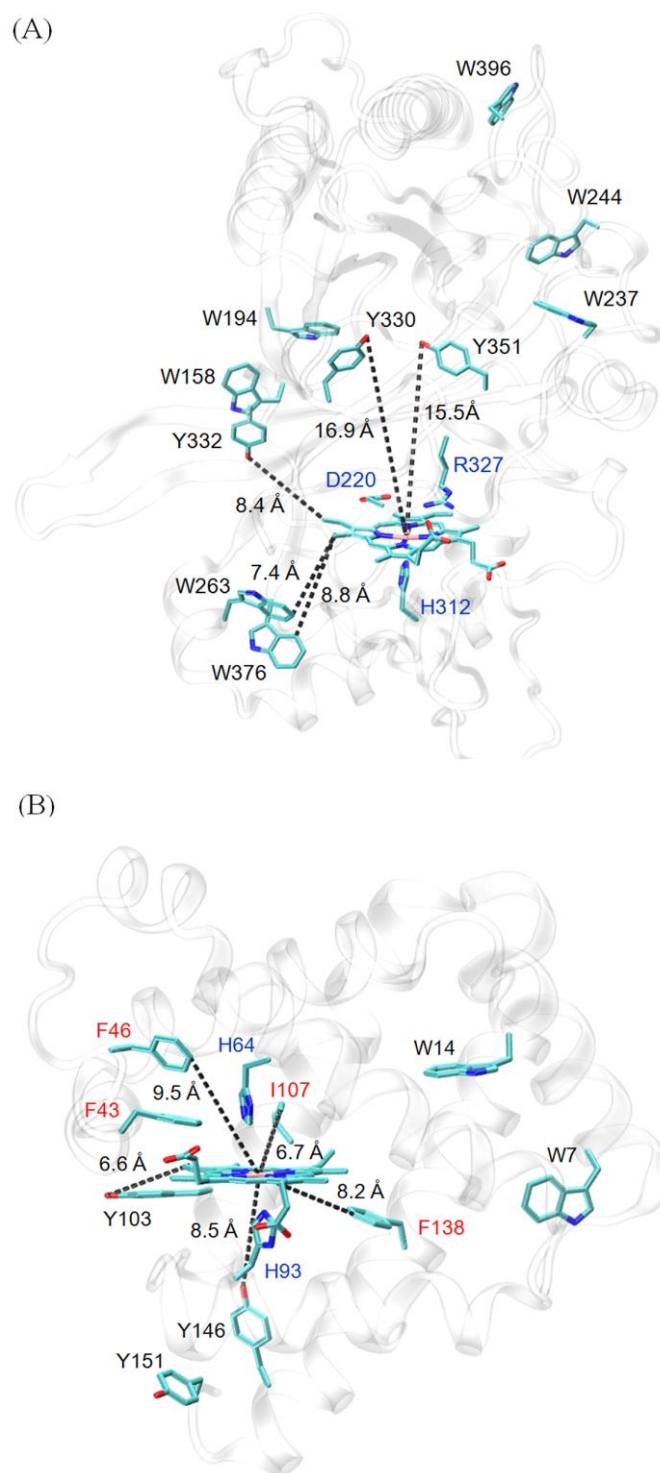

**Figure S1.** X-ray structure of (A) the bacterial *TcDyP* from *thermomonospora curvata* (PDB code 5JXU), and (B) sperm whale Mb (PDB code 1JP6), showing the location of all Tyr and Trp residues in the protein scaffold, and some other key residues in the heme pocket.

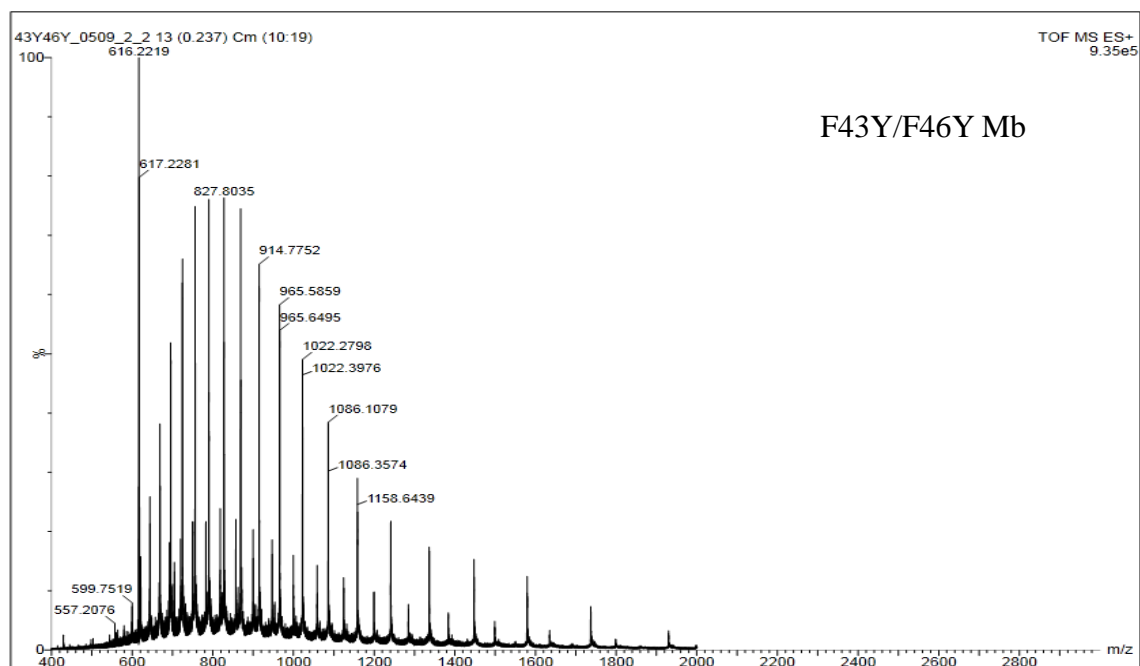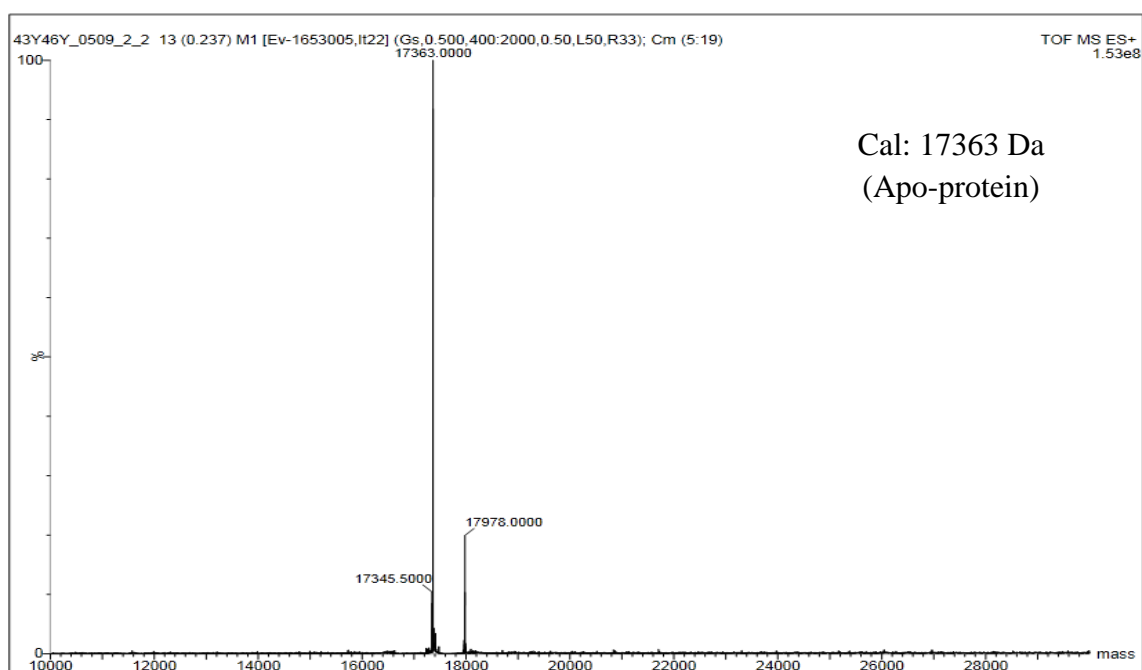

**Figure S2A.** MS spectra of F43Y/F46Y Mb: calculated molecular weight for the apo-protein, 17363 Da, and the observed, 17363 Da.

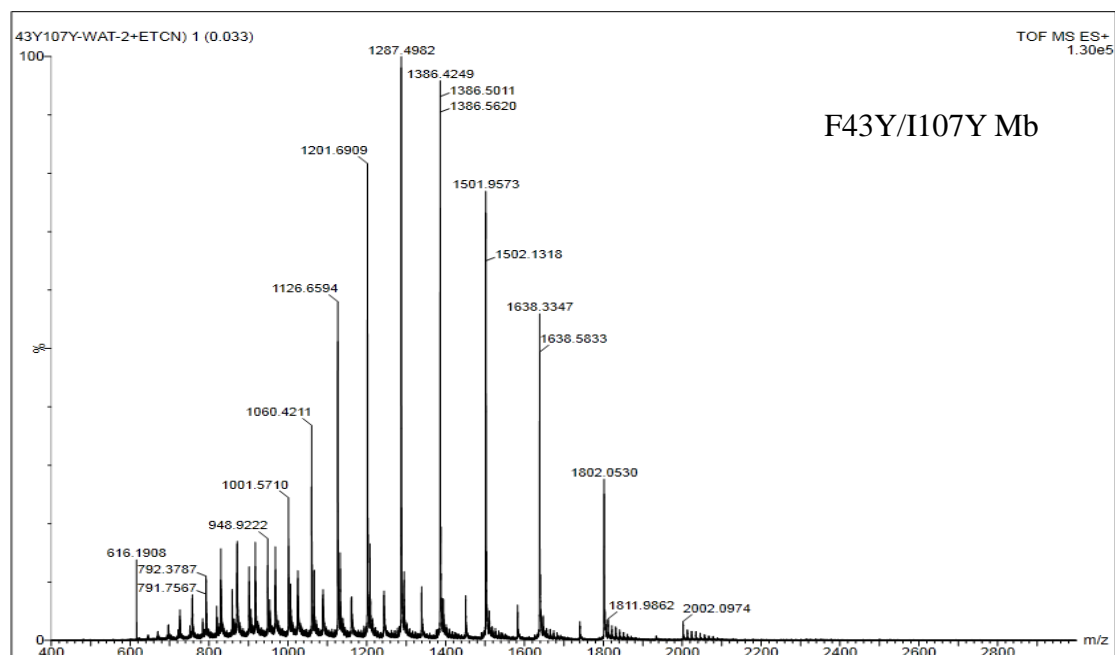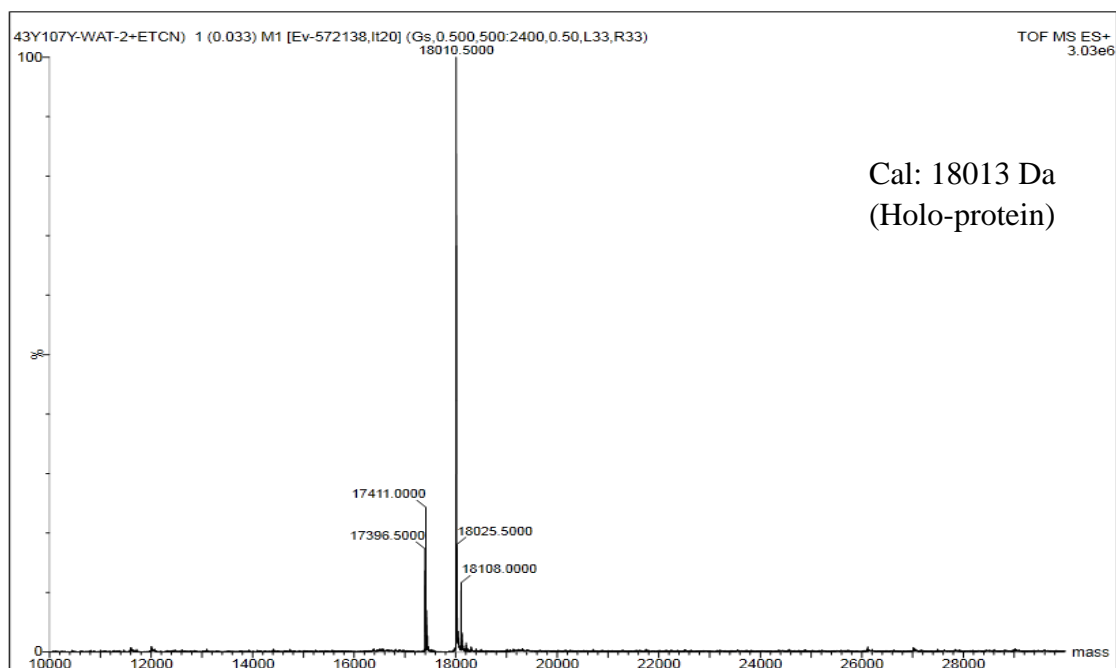

**Figure S2B.** MS spectra of F43Y/I107Y Mb: calculated molecular weight for the holo-protein, 18013 Da, and the observed, 18010.5 Da.

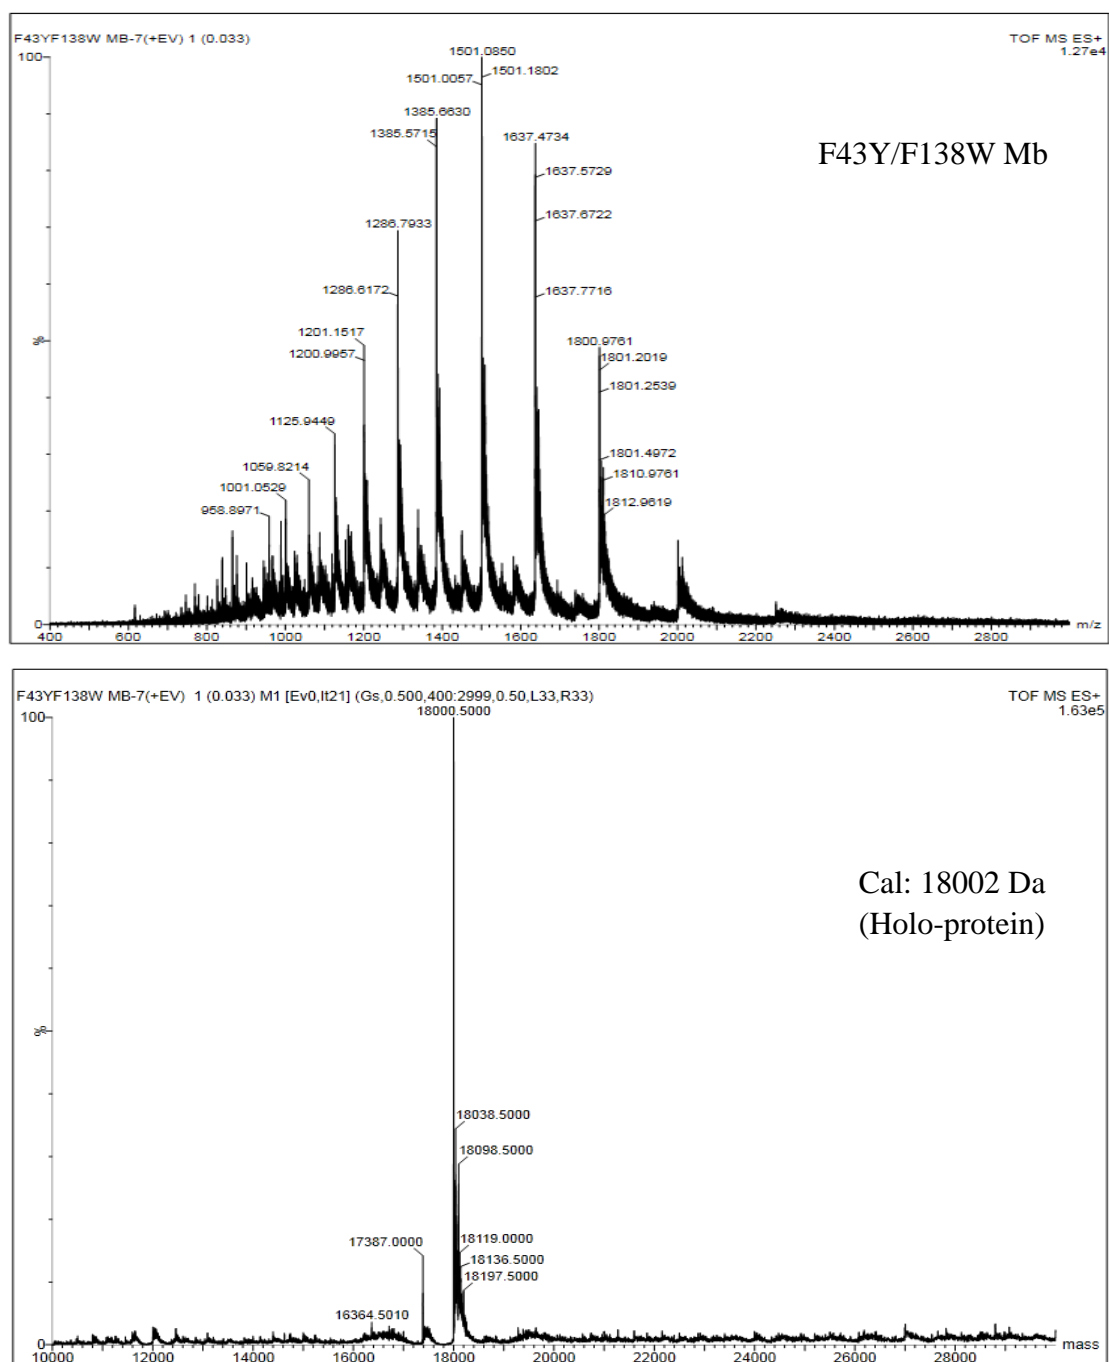

**Figure S2C.** MS spectra of F43Y/F138W Mb: calculated molecular weight for the holo-protein, 18002 Da, and the observed, 18000.5 Da.

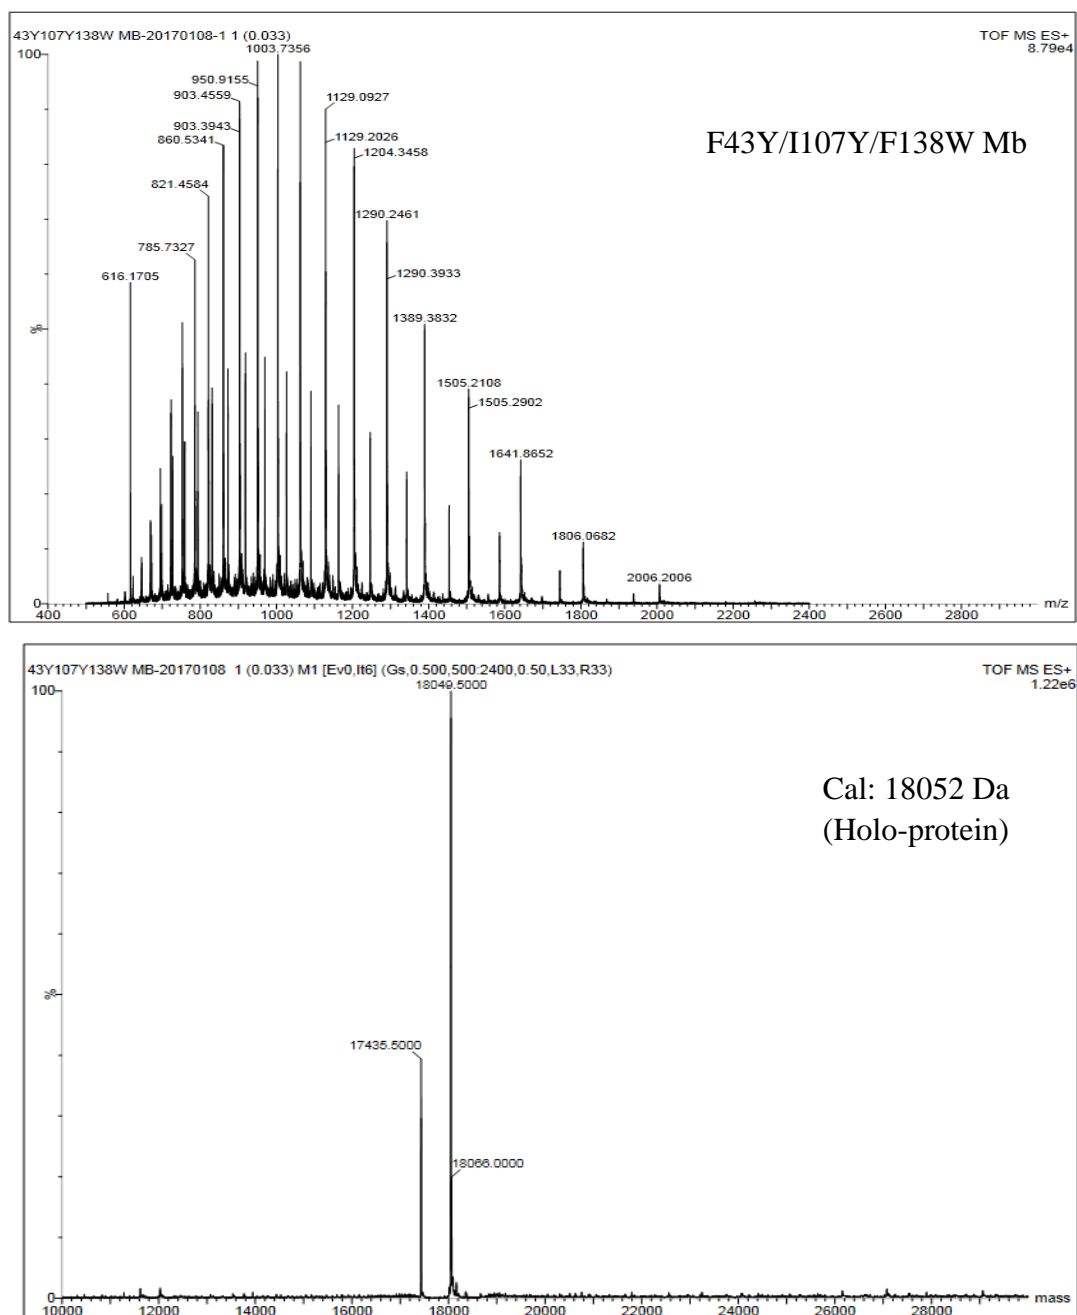

**Figure S2D.** MS spectra of F43Y/I107Y/F138W Mb: calculated molecular weight for the holo-protein, 18052 Da, and the observed, 18049.5 Da. An apo-form was also observed, 17435.5 Da, calculated, 17436 Da.

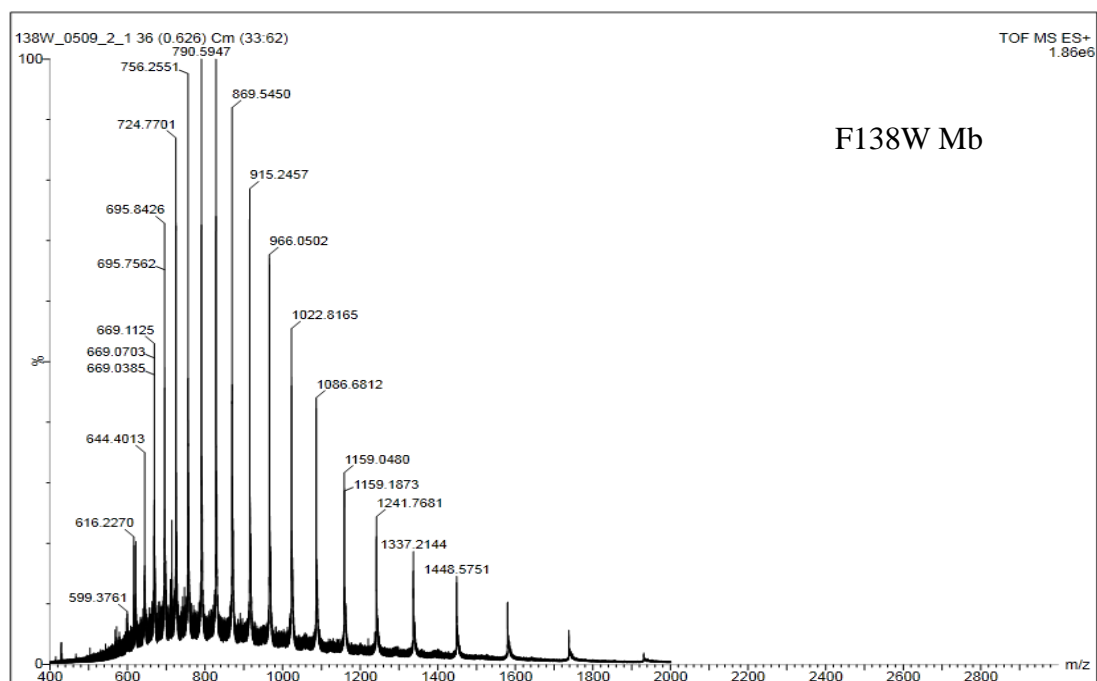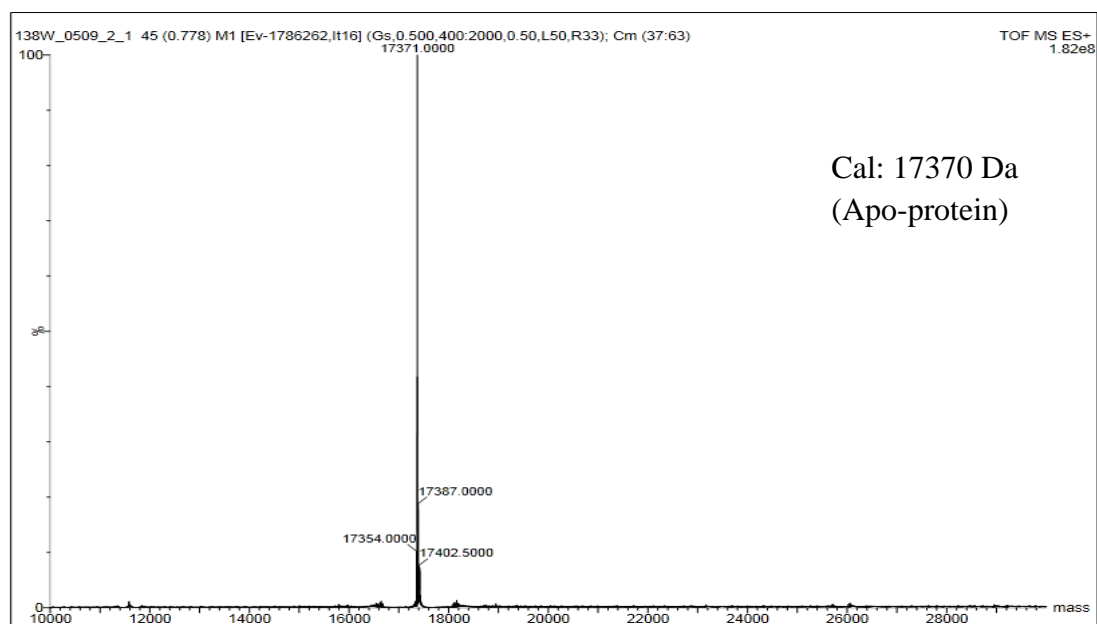

**Figure S2E.** MS spectra of F138W Mb: calculated molecular weight for the apo-protein, 17370 Da, and the observed, 17371 Da.

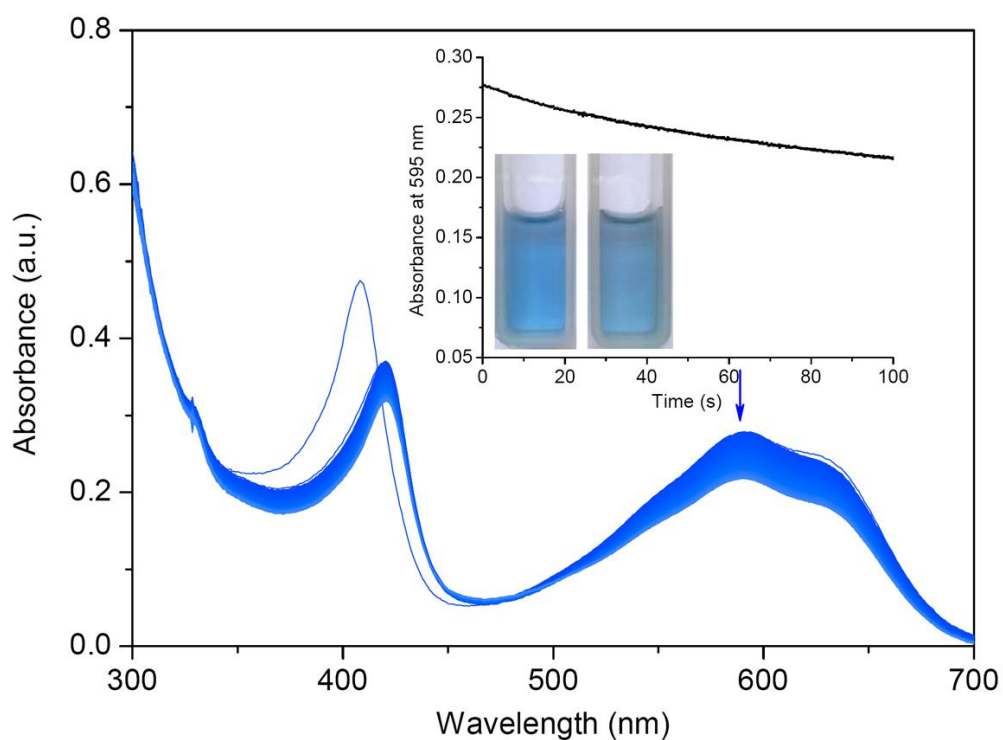

**Figure S3.** Stopped-flow spectra upon mixing WT Mb (7  $\mu$ M) in presence of RB19 (100  $\mu$ M) with H<sub>2</sub>O<sub>2</sub> (50 mM) in potassium phosphate buffer (100 mM, pH 7.0) at 25 °C, for 100 s. Inset: The kinetic change of absorption at 595 nm. The inset photo show the solution before and after RB19 oxidation under the same conditions



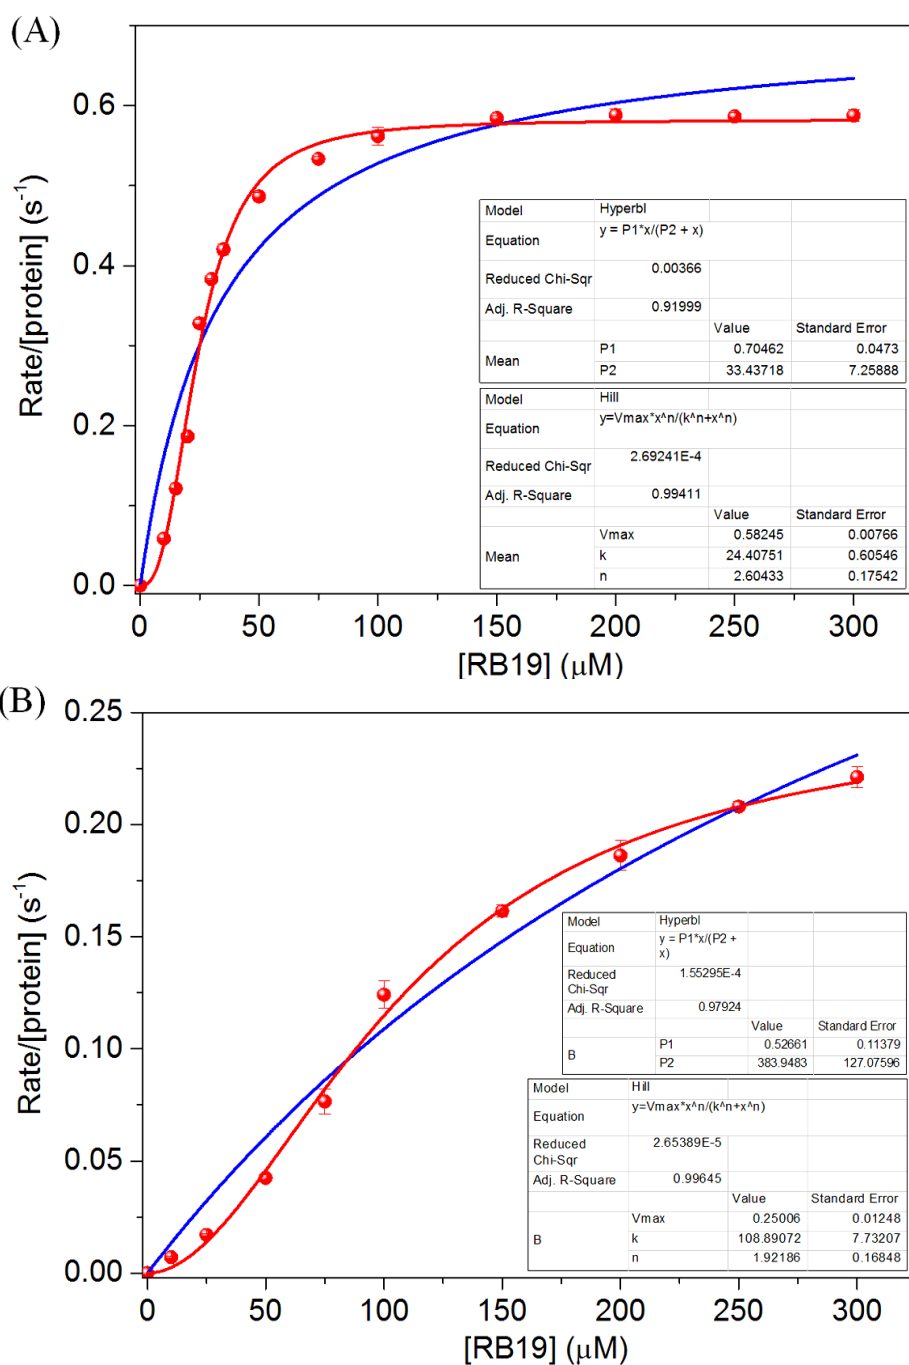

**Figure S4.** Steady-state rates of the peroxidation as a function of RB19 concentrations, as catalyzed by (A) F43Y/I107Y/F138W Mb and (B) F138W Mb. The data were fitted to Michaelis-Menten equation (blue) and Hill equation (red line), respectively.

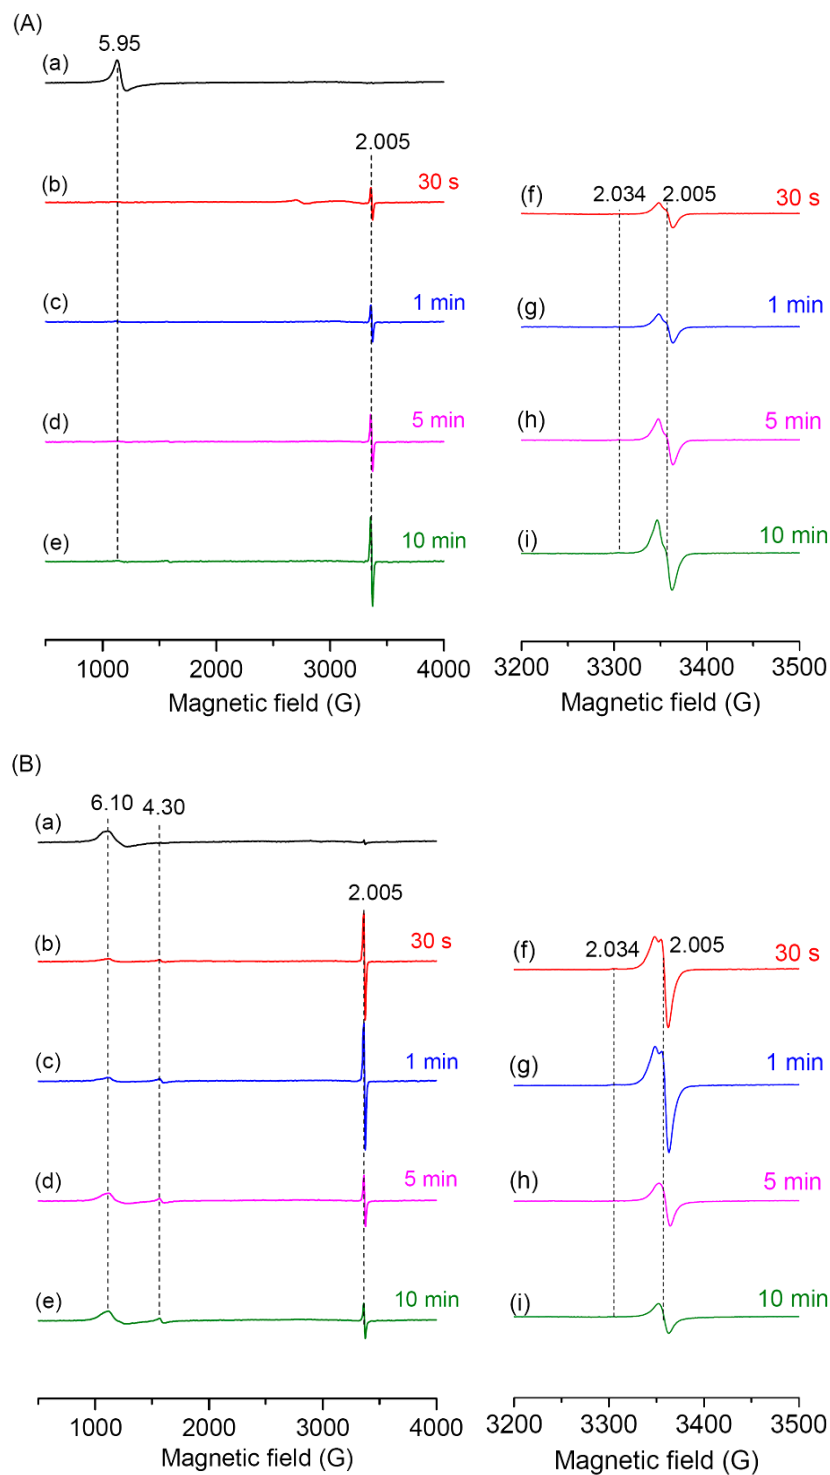

**Figure S5.** EPR spectra of (A) WT Mb and (B) F43Y Mb (0.5 mM) before (a) after addition of 5 eq.  $\text{H}_2\text{O}_2$  for 30 s (b), 1 min (c), 5 min (d) and 10 min (e). Detailed EPR spectra at g~2 region at different time points are shown in (f-i). The spectra were collected at 100 K, 0.595 mW power and 9.43 GHz.

**Table S1.** X-ray crystallography data collection and refinement statistics.

|                                                                          | <b>F43Y/F46Y Mb</b>            | <b>F138W Mb</b>                |
|--------------------------------------------------------------------------|--------------------------------|--------------------------------|
| Wavelength                                                               | 0.9795                         | 0.9795                         |
| Space group                                                              | $P2_12_12_1$                   | $P2_12_12_1$                   |
| Unit-cell dimensions (Å, °)                                              | $a = 39.856,$                  | $a = 39.881,$                  |
|                                                                          | $b = 48.495,$                  | $b = 48.679,$                  |
|                                                                          | $c = 78.669;$                  | $c = 77.821;$                  |
|                                                                          | $\alpha = \beta = \gamma = 90$ | $\alpha = \beta = \gamma = 90$ |
| Resolution (Å)                                                           | 50-1.70 (1.73-1.70)            | 50-1.85 (1.88-1.85)            |
| No. of observations                                                      | 638747                         | 184084                         |
| No. of unique reflections <sup>[a]</sup>                                 | 17156 (858)                    | 30559 (1312)                   |
| Completeness (%)                                                         | 98.5 (100.0)                   | 98.9 (85.0)                    |
| $\langle I \rangle / (I)$                                                | 26.0 (14.9)                    | 23.9 (8.2)                     |
| Redundancy                                                               | 13.9 (14.3)                    | 15.6 (18.4)                    |
| $R_{\text{sym}}^{\text{[b]}}$                                            | 0.11 (0.287)                   | 0.061 (0.559)                  |
| $R_{\text{cryst}}^{\text{[c]}} (\%) / R_{\text{free}}^{\text{[d]}} (\%)$ | 0.165 / 0.190                  | 0.176 / 0.225                  |
| Ramachandran plot, residues in:                                          |                                |                                |
| Most favored regions (%)                                                 | 95.36                          | 95.4                           |
| Allowed regions (%)                                                      | 4.64                           | 4.6                            |
| Disallowed regions (%)                                                   | 0.0                            | 0.0                            |
| PDB code                                                                 | 5XKW                           | 5XKV                           |

[a] Numbers in parentheses represent values in the highest resolution shell (Å).

[b]  $R_{\text{sym}} = \sum |I_j - \langle I \rangle| / \sum I_j$ , where  $I_j$  is the observed integrated intensity,  $\langle I \rangle$  is the average integrated intensity obtained from multiple measurements, and the summation is over all observed reflections. [c]  $R_{\text{cryst}} = \sum ||F_{\text{obs}}| - |F_{\text{calc}}|| / \sum |F_{\text{obs}}|$ ,  $F_{\text{obs}}$  and  $F_{\text{calc}}$  are observed and calculated structure factor amplitudes, respectively.

[d]  $R_{\text{free}}$  calculated with randomly selected reflections (5%).
